# Supplementary material
Source: publisher site journal article supplement (https://www.dovepress.com/article/350417)
Supplement: Supplementary file 1 [file get_supplementary_file.php]

**Table S1** The details of selected geneticpolymorphisms within transporter genes in Han Chinese in Beijing, China from 1000 Genomes Project Phase 3

| **Gene** | **SNP** | **Position (GRCh37.p13)** | **Allele*** | **Minor allele frequency** | **Most severe consequence** |
| --- | --- | --- | --- | --- | --- |
| *SLC19A1* |  |  |  |  |  |
|  | rs1051266 | Chromosome 21:46957794 | T/C | 0.48 | missense variant |
|  | rs1051296 | Chromosome 21:46934861 | A/C | 0.49 | 3 prime untranslated region (UTR) variant |
|  | rs1051298 | Chromosome 21:46934826 | G/A | 0.50 | 3 prime UTR variant |
|  | rs1131596 | Chromosome 21:46957916 | G/A | 0.48 | 5 prime UTR variant |
|  | rs12659 | Chromosome 21:46951556 | A/G | 0.49 | synonymous variant |
|  | rs2838956 | Chromosome 21:46945024 | G/A | 0.48 | intron variant |
|  | rs3788200 | Chromosome 21:46956571 | A/G | 0.48 | intron variant |
|  | rs7499 | Chromosome 21:46932328 | G/A | 0.45 | 3 prime UTR variant |
|  | rs7867 | Chromosome 21:46932652 | A/G | 0.50 | 3 prime UTR variant |
|  | rs79091853 | Chromosome 21:46950863 | T/C | 0.13 | synonymous variant |
|  | rs8199 | Chromosome 21:46932383 | G/A | 0.50 | 3 prime UTR variant |
| *ABCB1* |  |  |  |  |  |
|  | rs1045642 | Chromosome 7:87138645 | A/G | 0.38 | missense variant |
|  | rs1128503 | Chromosome 7:87179601 | G/A | 0.30 | synonymous variant |
|  | rs2032582 | Chromosome 7:87160618 | T/A/C | 0.16 | missense variant |
|  | rs3842 | Chromosome 7:87133366 | C/T | 0.30 | 3 prime UTR variant |
|  | rs4148737 | Chromosome 7:87171152 | C/T | 0.27 | intron variant |
| *ABCC1* |  |  |  |  |  |
|  | rs11075291 | Chromosome 16:16098475 | A/G | 0.41 | intron variant |
|  | rs129081 | Chromosome 16:16235939 | G/C | 0.29 | 3 prime UTR variant |
|  | rs1967120 | Chromosome 16:16108894 | A/G | 0.31 | intron variant |
|  | rs2074087 | Chromosome 16:16184232 | C/G | 0.22 | intron variant |
|  | rs212090 | Chromosome 16:16236004 | A/T | 0.15 | 3 prime UTR variant |
|  | rs212091 | Chromosome 16:16236650 | C/T | 0.24 | 3 prime UTR variant |
|  | rs2230671 | Chromosome 16:16228242 | A/G | 0.10 | synonymous variant |
|  | rs246221 | Chromosome 16:16138322 | C/T | 0.47 | synonymous variant |
|  | rs246240 | Chromosome 16:16119024 | G/A | 0.39 | intron variant |
|  | rs35587 | Chromosome 16:16139714 | C/T | 0.47 | missense variant |
|  | rs35592 | Chromosome 16:16141823 | C/T | 0.48 | intron variant |
|  | rs35605 | Chromosome 16:16162019 | T/C | 0.25 | missense variant |
|  | rs3743527 | Chromosome 16:16235681 | T/C | 0.47 | 3 prime UTR variant |
|  | rs3784862 | Chromosome 16:16110891 | A/G | 0.32 | intron variant |
|  | rs3784864 | Chromosome 16:16125325 | A/G | 0.27 | intron variant |
| *ABCC2* |  |  |  |  |  |
|  | rs2273697 | Chromosome 10:101563815 | A/G | 0.14 | missense variant |
|  | rs3740066 | Chromosome 10:101604207 | T/C | 0.25 | missense variant |
|  | rs4148396 | Chromosome 10:101591944 | T/C | 0.26 | intron variant |
|  | rs717620 | Chromosome 10:101542578 | T/C | 0.23 | 5 prime UTR variant |
| *ABCC3* |  |  |  |  |  |
|  | rs2277624 | Chromosome 17:48761105 | T/C | 0.20 | synonymous variant |
|  | rs4148416 | Chromosome 17:48753423 | T/C | 0.10 | synonymous variant |
|  | rs9895420 | Chromosome 17:48712038 | A/T | 0.07 | 2KB Upstream Variant |
| *ABCC4* |  |  |  |  |  |
|  | rs1059751 | Chromosome 13:95672950 | G/A | 0.49 | 3 prime UTR variant |
|  | rs11568658 | Chromosome 13:95863008 | A/C | 0.18 | missense variant |
|  | rs1189466 | Chromosome 13:95726541 | A/G | 0.19 | missense variant |
|  | rs1678339 | Chromosome 13:95727780 | T/C | 0.19 | missense variant |
|  | rs1751034 | Chromosome 13:95714976 | C/T | 0.19 | missense variant |
|  | rs2274405 | Chromosome 13:95858978 | T/C | 0.45 | synonymous variant |
|  | rs2274406 | Chromosome 13:95858996 | T/C | 0.45 | missense variant |
|  | rs2274407 | Chromosome 13:95859035 | A/C | 0.14 | missense variant |
|  | rs3742106 | Chromosome 13:95673791 | A/C | 0.50 | 3 prime UTR variant |
|  | rs3770 | Chromosome 13:95672237 | G/A | 0.49 | 3 prime UTR variant |
|  | rs4148551 | Chromosome 13:95673518 | T/C | 0.50 | 3 prime UTR variant |
|  | rs4148553 | Chromosome 13:95673135 | T/C | 0.49 | 3 prime UTR variant |
|  | rs6650282 | Chromosome 13:95748221 | C/T | 0.32 | 3 prime UTR variant |
|  | rs899494 | Chromosome 13:95861804 | A/G | 0.23 | synonymous variant |
| *ABCG2* |  |  |  |  |  |
|  | rs1448784 | Chromosome 4:89012320 | G/A | 0.24 | 3 prime UTR variant |
|  | rs2231137 | Chromosome 4:89061114 | T/C | 0.31 | missense variant |
|  | rs2231142 | Chromosome 4:89052323 | T/G | 0.31 | missense variant |
|  | rs4367138 | Chromosome 4:89107653 | G/A | 0.31 | intron variant |
|  | rs72554040 | Chromosome 4:89152324 | A/G | 0.43 | 5 prime UTR variant |

*Minor allele/Major allele

**Table S2** The results of Hardy-Weinberg equilibrium (HWE) test

| **Gene** | **SNP** | **Genotype** | **n (%)** | ***P* (Hardy-Weinberg equilibrium test)** |
| --- | --- | --- | --- | --- |
| *SLC19A1* | rs1051266 | C/C | 31 (31.00) | 0.40 |
|  |  | C/T | 53 (53.00) |  |
|  |  | T/T | 16 (16.00) |  |
| *SLC19A1* | rs1131596 | A/A | 31 (31.00) | 0.40 |
|  |  | A/G | 53 (53.00) |  |
|  |  | G/G | 16 (16.00) |  |
| *SLC19A1* | rs12659 | G/G | 32 (32.00) | 0.66 |
|  |  | A/G | 51 (51.00) |  |
|  |  | A/A | 17 (17.00) |  |
| *SLC19A1* | rs2838956 | A/A | 32 (32.00) | 0.66 |
|  |  | A/G | 51 (51.00) |  |
|  |  | G/G | 17 (17.00) |  |
| *SLC19A1* | rs3788200 | G/G | 30 (30.00) | 0.62 |
|  |  | A/G | 50 (50.00) |  |
|  |  | A/A | 17 (17.00) |  |
| *SLC19A1* | rs7867 | G/G | 28 (28.00) | 0.49 |
|  |  | A/G | 53 (53.00) |  |
|  |  | A/A | 19 (19.00) |  |
| *SLC19A1* | rs79091853 | C/C | 77 (77.00) | 0.68 |
|  |  | C/T | 22 (22.00) |  |
|  |  | T/T | 1 (1.00) |  |
| *ABCB1* | rs1045642 | G/G | 41 (41.00) | 0.58 |
|  |  | A/G | 48 (48.00) |  |
|  |  | A/A | 11 (11.00) |  |
| *ABCB1* | rs1128503 | A/A | 33 (33.00) | 0.13 |
|  |  | A/G | 55 (55.00) |  |
|  |  | G/G | 12 (12.00) |  |
| *ABCB1* | rs3842 | T/T | 50 (50.00) | 0.89 |
|  |  | T/C | 41 (41.00) |  |
|  |  | C/C | 9 (9.00) |  |
| *ABCB1* | rs4148737 | T/T | 40 (40.00) | 0.89 |
|  |  | T/C | 47 (47.00) |  |
|  |  | C/C | 13 (13.00) |  |
| *ABCC1* | rs11075291 | G/G | 35 (35.00) | 0.23 |
|  |  | A/G | 53 (53.00) |  |
|  |  | A/A | 12 (12.00) |  |
| *ABCC1* | rs1967120 | G/G | 51 (51.00) | 0.95 |
|  |  | A/G | 41 (41.00) |  |
|  |  | A/A | 8 (8.00) |  |
| *ABCC1* | rs2074087 | G/G | 74 (74.00) | 0.47 |
|  |  | G/C | 23 (23.00) |  |
|  |  | C/C | 3 (3.00) |  |
| *ABCC1* | rs212091 | T/T | 56 (56.00) | 0.33 |
|  |  | T/C | 40 (40.00) |  |
|  |  | C/C | 4 (4.00) |  |
| *ABCC1* | rs2230671 | G/G | 79 (79.00) | 0.24 |
|  |  | A/G | 21 (21.00) |  |
| *ABCC1* | rs246221 | T/T | 27 (27.00) | 0.55 |
|  |  | T/C | 47 (47.00) |  |
|  |  | C/C | 26 (26.00) |  |
| *ABCC1* | rs246240 | A/A | 31 (31.00) | 0.54 |
|  |  | A/G | 52 (52.00) |  |
|  |  | G/G | 17 (17.00) |  |
| *ABCC1* | rs35587 | T/T | 27 (27.00) | 0.55 |
|  |  | T/C | 47 (47.00) |  |
|  |  | C/C | 26 (26.00) |  |
| *ABCC1* | rs35592 | C/C | 27 (27.00) | 0.69 |
|  |  | C/T | 48 (48.00) |  |
|  |  | T/T | 25 (25.00) |  |
| *ABCC1* | rs35605 | C/C | 65 (65.00) | 0.90 |
|  |  | C/T | 31 (31.00) |  |
|  |  | T/T | 4 (4.00) |  |
| *ABCC1* | rs3743527 | C/C | 25 (25.00) | 0.84 |
|  |  | C/T | 51 (51.00) |  |
|  |  | T/T | 24 (24.00) |  |
| *ABCC1* | rs3784864 | G/G | 59 (59.00) | 0.14 |
|  |  | A/G | 32 (32.00) |  |
|  |  | A/A | 9 (9.00) |  |
| *ABCC2* | rs2273697 | G/G | 80 (80.00) | 0.27 |
|  |  | A/G | 20 (20.00) |  |
| *ABCC2* | rs3740066 | C/C | 51 (51.00) | 0.12 |
|  |  | C/T | 45 (45.00) |  |
|  |  | T/T | 4 (4.00) |  |
| *ABCC2* | rs4148396 | C/C | 57 (57.00) | 0.68 |
|  |  | C/T | 38 (38.00) |  |
|  |  | T/T | 5 (5.00) |  |
| *ABCC2* | rs717620 | C/C | 55 (55.00) | 0.51 |
|  |  | C/T | 40 (40.00) |  |
|  |  | T/T | 5 (5.00) |  |
| *ABCC3* | rs2277624 | C/C | 52 (52.00) | 0.67 |
|  |  | C/T | 39 (39.00) |  |
|  |  | T/T | 9 (9.00) |  |
| *ABCC3* | rs4148416 | C/C | 75 (75.00) | 0.88 |
|  |  | C/T | 23 (23.00) |  |
|  |  | T/T | 2 (2.00) |  |
| *ABCC4* | rs1059751 | A/A | 31 (31.00) | 0.34 |
|  |  | A/G | 45 (45.00) |  |
|  |  | G/G | 24 (24.00) |  |
| *ABCC4* | rs11568658 | C/C | 77 (77.00) | 0.68 |
|  |  | A/C | 22 (22.00) |  |
|  |  | A/A | 1 (1.00) |  |
| *ABCC4* | rs1189466 | G/G | 55 (55.00) | 0.62 |
|  |  | A/G | 37 (37.00) |  |
|  |  | A/A | 8 (8.00) |  |
| *ABCC4* | rs1678339 | C/C | 55 (55.00) | 0.62 |
|  |  | C/T | 37 (37.00) |  |
|  |  | T/T | 8 (8.00) |  |
| *ABCC4* | rs1751034 | T/T | 54 (54.00) | 0.47 |
|  |  | T/C | 37 (37.00) |  |
|  |  | C/C | 9 (9.00) |  |
| *ABCC4* | rs2274405 | T/T | 27 (27.00) | 0.55 |
|  |  | T/C | 47 (47.00) |  |
|  |  | C/C | 26 (26.00) |  |
| *ABCC4* | rs2274406 | T/T | 27 (27.00) | 0.55 |
|  |  | T/C | 47 (47.00) |  |
|  |  | C/C | 26 (26.00) |  |
| *ABCC4* | rs2274407 | C/C | 73 (73.00) | 0.93 |
|  |  | A/C | 25 (25.00) |  |
|  |  | A/A | 2 (2.00) |  |
| *ABCC4* | rs3742106 | C/C | 30 (30.00) | 0.33 |
|  |  | A/C | 45 (45.00) |  |
|  |  | A/A | 25 (25.00) |  |
| *ABCC4* | rs3770 | A/A | 30 (30.00) | 0.24 |
|  |  | A/G | 44 (44.00) |  |
|  |  | G/G | 26 (26.00) |  |
| *ABCC4* | rs4148551 | C/C | 30 (30.00) | 0.33 |
|  |  | C/T | 45 (45.00) |  |
|  |  | T/T | 25 (25.00) |  |
| *ABCC4* | rs4148553 | C/C | 31 (31.00) | 0.34 |
|  |  | C/T | 45 (45.00) |  |
|  |  | T/T | 24 (24.00) |  |
| *ABCC4* | rs6650282 | T/T | 53 (53.00) | 0.83 |
|  |  | T/C | 39 (39.00) |  |
|  |  | C/C | 8 (8.00) |  |
| *ABCC4* | rs899494 | G/G | 58 (58.00) | 0.19 |
|  |  | A/G | 33 (33.00) |  |
|  |  | A/A | 9 (9.00) |  |
| *ABCG2* | rs1448784 | A/A | 48 (48.00) | 0.24 |
|  |  | A/G | 46 (46.00) |  |
|  |  | G/G | 6 (6.00) |  |
| *ABCG2* | rs2231137 | C/C | 40 (40.00) | 0.01 |
|  |  | C/T | 55 (55.00) |  |
|  |  | T/T | 5 (5.00) |  |
| *ABCG2* | rs2231142 | G/G | 51 (51.00) | 0.95 |
|  |  | G/T | 41 (41.00) |  |
|  |  | T/T | 8 (8.00) |  |
| *ABCG2* | rs4367138 | A/A | 48 (48.00) | 0.63 |
|  |  | A/G | 44 (44.00) |  |
|  |  | G/G | 8 (8.00) |  |
| *ABCG2* | rs72554040 | G/G | 37 (37.00) | 0.73 |
|  |  | A/G | 49 (49.00) |  |
|  |  | A/A | 14 (14.00) |  |

**Table S3** Bivariate association between baseline characteristics and clinical response to methotrexate assessed according to European League Against Rheumatism (EULAR) good and moderate response in rheumatoid arthritis patients

| Characteristics | RA patients  (n = 100) | Responders  (n = 77) | Non-responders  (n = 23) | *P* |
| --- | --- | --- | --- | --- |
| Age, years | 52.23 ± 12.71 | 52.04 ± 12.85 | 52.87 ± 12.50 | 0.78 |
| Female, n (%) | 81 (81.00) | 65 (84.42) | 16 (69.57) | 0.13e |
| Disease duration, years, median (IQR) | 0.50 (0.25-2.00) | 0.50 (0.17-1.33) | 0.83 (0.42-4.00) | 0.06 |
| **Smokinga, n (%)** | **12 (12.77)** | **6 (8.33)** | **6 (27.27)** | **0.03e** |
| **Drinkinga, n (%)** | **12 (12.77)** | **6 (8.33)** | **6 (27.27)** | **0.03e** |
| RF-positiveb, n (%) | 82 (84.54) | 63 (84.00) | 19 (86.36) | 1.00e |
| CCP-positivec, n (%) | 91 (92.86) | 71 (93.42) | 20 (90.91) | 0.65e |
| **TJC (per 28 joints), median (IQR)** | **5.0 (2.5-10.0)** | **7.0 (3.0-10.0)** | **3.0 (2.0-6.0)** | **< 0.01** |
| SJC (per 28 joints), median (IQR) | 4.0 (2.0-8.5) | 4.0 (2.0-9.0) | 3.0 (2.0-7.0) | 0.53 |
| **ESR, mm/h, median (IQR)** | **37 (20-59.5)** | **39 (28-62)** | **24 (12-44)** | **0.02** |
| **DAS28-ESR** | **4.87 ± 1.15** | **5.07 ± 1.12** | **4.22 ± 1.05** | **< 0.01** |
| Methotrexate dose, mg/week, median (IQR) | 10 (10-10) | 10 (10-10) | 10 (10-10) | 0.98 |
| Concomitant GC use, n (%) | 82 (82.00) | 65 (84.42) | 17 (73.91) | 0.35e |
| GC dosed, mg/d, median (IQR) | 5.0 (2.5-10.0) | 5.0 (2.5-10.0) | 5.0 (0-10.0) | 0.67 |
| **Concomitant NSAIDs use, n (%)** | **23 (23.00)** | **14 (18.18)** | **9 (39.13)** | **0.04** |

Values are mean ± standard deviation unless otherwise stated, and bold values indicate statistical significance at α = 0.05.

CCP cyclic citrullinated peptide, DAS28 disease activity score in 28 joints, ESR erythrocyte sedimentation rate, GC glucocorticoids, IQR interquartile range, NSAIDs non-steroidal anti-inflammatory drugs, RF rheumatoid factor, SJC swollen joint count, TJC tender joint count

a6 patients’s data was missing

b3 patients’ data was missing

c2 patients’ data was missing

dPrednisolone equivalent

eFisher exact test

**Table S4** Multivariable analysis results for associations of genetic polymorphisms within transporter genes with clinical response to methotrexate assessed according to European League Against Rheumatism (EULAR) good and moderate response in rheumatoid arthritis patients*

| Gene | SNP | Allelea | Dominant modelb | |  | Recessive modelc | |
| --- | --- | --- | --- | --- | --- | --- | --- |
| RR (95%CI) | *P* |  | RR (95%CI) | *P* |
| *SLC19A1* | rs1051266 | T/C | 1.44 (1.00-2.06) | 0.05 |  | 1.14 (0.94-1.39) | 0.17 |
| *SLC19A1* | rs1131596 | G/A | 1.44 (1.00-2.06) | 0.05 |  | 1.14 (0.94-1.39) | 0.17 |
| *SLC19A1* | rs12659 | A/G | **1.42 (1.02-1.97)** | **0.04** |  | 1.09 (0.89-1.34) | 0.39 |
| *SLC19A1* | rs2838956 | G/A | 1.37 (0.98-1.92) | 0.07 |  | 1.16 (0.96-1.40) | 0.13 |
| *SLC19A1* | rs3788200 | A/G | **1.45 (1.04-2.01)** | **0.03** |  | 1.13 (0.93-1.37) | 0.22 |
| *SLC19A1* | rs7867 | A/G | 1.24 (0.92-1.68) | 0.16 |  | 1.07 (0.86-1.32) | 0.57 |
| *SLC19A1* | rs79091853 | T/C | - | - |  | 0.85 (0.70-1.03) | 0.09 |
| *ABCB1* | rs1045642 | A/G | 0.92 (0.70-1.22) | 0.58 |  | 0.91 (0.74-1.12) | 0.38 |
| *ABCB1* | rs1128503 | G/A | 1.49 (0.91-2.45) | 0.12 |  | 1.07 (0.88-1.30) | 0.49 |
| *ABCB1* | rs3842 | C/T | 0.92 (0.66-1.29) | 0.65 |  | 1.21 (0.98-1.49) | 0.08 |
| *ABCB1* | rs4148737 | C/T | 1.41 (0.92-2.16) | 0.11 |  | 1.05 (0.86-1.27) | 0.66 |
| *ABCC1* | rs11075291 | A/G | 1.04 (0.79-1.38) | 0.77 |  | 1.12 (0.92-1.38) | 0.26 |
| *ABCC1* | rs1967120 | A/G | 1.09 (0.73-1.63) | 0.66 |  | 1.01 (0.83-1.24) | 0.93 |
| *ABCC1* | rs2074087 | C/G | 1.17 (0.67-2.03) | 0.58 |  | 1.15 (0.90-1.47) | 0.25 |
| *ABCC1* | rs212091 | C/T | - | - |  | 1.06 (0.87-1.30) | 0.55 |
| *ABCC1* | rs2230671d | A/G | 0.95 (0.72-1.26) | 0.75 |  | - | - |
| *ABCC1* | rs246221 | C/T | 0.96 (0.76-1.22) | 0.76 |  | 0.91 (0.73-1.13) | 0.40 |
| *ABCC1* | rs246240 | G/A | 0.82 (0.65-1.04) | 0.10 |  | 0.90 (0.73-1.11) | 0.32 |
| *ABCC1* | rs35587 | C/T | 0.96 (0.76-1.22) | 0.76 |  | 0.91 (0.73-1.13) | 0.40 |
| *ABCC1* | rs35592 | T/C | 1.06 (0.85-1.32) | 0.60 |  | 1.11 (0.90-1.37) | 0.35 |
| *ABCC1* | rs35605 | T/C | 1.02 (0.69-1.53) | 0.91 |  | 1.22 (0.97-1.53) | 0.09 |
| *ABCC1* | rs3743527 | T/C | 0.89 (0.70-1.13) | 0.35 |  | 1.18 (0.99-1.42) | 0.07 |
| *ABCC1* | rs3784864 | A/G | 0.93 (0.72-1.19) | 0.55 |  | 0.99 (0.81-1.22) | 0.94 |
| *ABCC2* | rs2273697d | A/G | 1.21 (0.90-1.63) | 0.20 |  | - | - |
| *ABCC2* | rs3740066 | T/C | **0.88 (0.80-0.98)** | **0.02** |  | **0.80 (0.65-0.98)** | **0.03** |
| *ABCC2* | rs4148396 | T/C | 1.03 (0.67-1.58) | 0.90 |  | **0.79 (0.65-0.96)** | **0.02** |
| *ABCC2* | rs717620 | T/C | 1.17 (0.65-2.09) | 0.60 |  | **0.77 (0.63-0.94)** | **0.01** |
| *ABCC3* | rs2277624 | T/C | 1.17 (0.81-1.69) | 0.41 |  | 1.04 (0.84-1.28) | 0.74 |
| *ABCC3* | rs4148416 | T/C | - | - |  | 1.24 (0.94-1.62) | 0.12 |
| *ABCC4* | rs1059751 | G/A | 1.00 (0.79-1.28) | 0.98 |  | 1.05 (0.83-1.31) | 0.70 |
| *ABCC4* | rs11568658 | A/C | - | - |  | 1.00 (0.79-1.27) | 1.00 |
| *ABCC4* | rs1189466 | A/G | 0.98 (0.69-1.40) | 0.93 |  | 0.96 (0.77-1.18) | 0.68 |
| *ABCC4* | rs1678339 | T/C | 0.98 (0.69-1.40) | 0.93 |  | 0.96 (0.77-1.18) | 0.68 |
| *ABCC4* | rs1751034 | C/T | 0.92 (0.66-1.27) | 0.61 |  | 0.94 (0.77-1.16) | 0.58 |
| *ABCC4* | rs2274405 | C/T | 1.10 (0.87-1.39) | 0.43 |  | 0.96 (0.76-1.21) | 0.73 |
| *ABCC4* | rs2274406 | C/T | 1.10 (0.87-1.39) | 0.43 |  | 0.96 (0.76-1.21) | 0.73 |
| *ABCC4* | rs2274407 | A/C | - | - |  | 0.96 (0.75-1.23) | 0.77 |
| *ABCC4* | rs3742106 | A/C | 1.00 (0.79-1.26) | 0.99 |  | 1.03 (0.82-1.29) | 0.81 |
| *ABCC4* | rs3770 | G/A | 1.00 (0.79-1.25) | 0.97 |  | 1.03 (0.82-1.29) | 0.81 |
| *ABCC4* | rs4148551 | T/C | 1.00 (0.79-1.26) | 0.99 |  | 1.03 (0.82-1.29) | 0.81 |
| *ABCC4* | rs4148553 | T/C | 1.00 (0.79-1.28) | 0.98 |  | 1.05 (0.83-1.31) | 0.70 |
| *ABCC4* | rs6650282 | C/T | 1.14 (0.73-1.79) | 0.56 |  | 0.93 (0.76-1.13) | 0.46 |
| *ABCC4* | rs899494 | A/G | 1.00 (0.70-1.41) | 0.99 |  | 1.06 (0.86-1.30) | 0.60 |
| *ABCG2* | rs1448784 | G/A | 1.01 (0.55-1.87) | 0.97 |  | 0.85 (0.69-1.04) | 0.12 |
| *ABCG2* | rs2231142 | T/G | 0.91 (0.70-1.18) | 0.46 |  | 0.95 (0.77-1.16) | 0.60 |
| *ABCG2* | rs4367138 | G/A | 0.95 (0.67-1.36) | 0.79 |  | 0.94 (0.76-1.16) | 0.58 |
| *ABCG2* | rs72554040 | A/G | 1.02 (0.77-1.33) | 0.91 |  | 0.92 (0.74-1.14) | 0.44 |

Bold values indicate statistical significance at α = 0.05.

*Adjusted for smoking, drinking, disease activity score in 28 joints- erythrocyte sedimentation rate (DAS28-ESR) and concomitant non-steroidal anti-inflammatory drugs (NSAIDs) use

aMinor allele/Major allele

bDominant model: Major allele carriers versus minor allele homozygotes

cRecessive model: Major allele homozygotes versus minor allele carriers

dMajor allele homozygotes versus heterozygotes due to no minor allele homozygotes

**Table S5** Bivariate association between baseline characteristics and clinical response to methotrexate assessed according to disease activity score in 28 joints - erythrocyte sedimentation rate (DAS28-ESR) low disease activity in rheumatoid arthritis patients

| Characteristics | RA patients  (n = 100) | Responders  (n = 57) | Non-responders  (n = 43) | *P* |
| --- | --- | --- | --- | --- |
| Age, years | 52.23 ± 12.71 | 52.09 ± 12.60 | 52.42 ± 13.01 | 0.90 |
| Female, n (%) | 81 (81.00) | 48 (84.21) | 33 (76.74) | 0.35 |
| Disease duration, years, median (IQR) | 0.50 (0.25-2.00) | 0.50 (0.17-1.25) | 0.83 (0.33-2.00) | 0.16 |
| Smokinga, n (%) | 12 (12.77) | 6 (11.32) | 6 (14.63) | 0.63 |
| Drinkinga, n (%) | 12 (12.77) | 5 (9.43) | 7 (17.07) | 0.27 |
| RF-positiveb, n (%) | 82 (84.54) | 48 (85.71) | 34 (82.93) | 0.71 |
| CCP-positivec, n (%) | 91 (92.86) | 51 (91.07) | 40 (95.24) | 0.70e |
| TJC (per 28 joints), median (IQR) | 5.0 (2.5-10.0) | 5.0 (2.0-9.0) | 7.0 (3.0-12.0) | 0.16 |
| SJC (per 28 joints), median (IQR) | 4.0 (2.0-8.5) | 4.0 (2.0-7.0) | 5.0 (2.0-11.0) | 0.09 |
| **ESR, mm/h, median (IQR)** | **37.0 (20.0-59.5)** | **32.0 (17.0-51.0)** | **44.0 (30.0-73.0)** | **0.02** |
| **DAS28-ESR** | **4.87 ± 1.15** | **4.63 ± 1.10** | **5.19 ± 1.15** | **0.02** |
| Methotrexate dose, mg/week, median (IQR) | 10 (10-10) | 10 (10-10) | 10 (10-10) | 0.12 |
| Concomitant GC use, n (%) | 82 (82.00) | 48 (84.21) | 34 (79.07) | 0.51 |
| GC dosed, mg/d, median (IQR) | 5.00 (2.50-10.00) | 5.0 (2.50-10.00) | 5.00 (1.88-10.00) | 0.51 |
| Concomitant NSAIDs use, n (%) | 23 (23.00) | 15 (26.32) | 8 (18.60) | 0.36 |

Values are mean ± standard deviation unless otherwise stated, and bold values indicate statistical significance at α = 0.05.

CCP cyclic citrullinated peptide, DAS28 disease activity score in 28 joints, ESR erythrocyte sedimentation rate, GC glucocorticoids, IQR interquartile range, NSAIDs non-steroidal anti-inflammatory drugs, RF rheumatoid factor, SJC swollen joint count, TJC tender joint count

a6 patients’s data was missing

b3 patients’ data was missing

c2 patients’ data was missing

dPrednisolone equivalent

eFisher exact test

**Table S6** Multivariable analysis results for associations of genetic polymorphisms within transporter genes with clinical response to methotrexate assessed according to disease activity score in 28 joints - erythrocyte sedimentation rate (DAS28-ESR) low disease activity in rheumatoid arthritis patients*

| Gene | SNP | Allelea | Dominant modelb | |  | Recessive modelc | |
| --- | --- | --- | --- | --- | --- | --- | --- |
| RR (95%CI) | *P* |  | RR (95%CI) | *P* |
| *SLC19A1* | rs1051266 | T/C | 1.64 (0.87-3.11) | 0.13 |  | 1.01 (0.71-1.44) | 0.97 |
| *SLC19A1* | rs1131596 | G/A | 1.64 (0.87-3.11) | 0.13 |  | 1.01 (0.71-1.44) | 0.97 |
| *SLC19A1* | rs12659 | A/G | 1.49 (0.84-2.65) | 0.17 |  | 0.96 (0.67-1.38) | 0.84 |
| *SLC19A1* | rs2838956 | G/A | 1.49 (0.84-2.65) | 0.17 |  | 1.04 (0.74-1.48) | 0.82 |
| *SLC19A1* | rs3788200 | A/G | 1.51 (0.85-2.69) | 0.16 |  | 1.17 (0.79-1.72) | 0.44 |
| *SLC19A1* | rs7867 | A/G | 1.29 (0.80-2.10) | 0.30 |  | 0.80 (0.53-1.20) | 0.28 |
| *SLC19A1* | rs79091853 | T/C | - | - |  | 1.04 (0.68-1.59) | 0.86 |
| *ABCB1* | rs1045642 | A/G | 1.05 (0.62-1.79) | 0.85 |  | 0.93 (0.66-1.31) | 0.68 |
| *ABCB1* | rs1128503 | G/A | 1.13 (0.63-2.02) | 0.68 |  | 1.29 (0.95-1.75) | 0.11 |
| *ABCB1* | rs3842 | C/T | 0.89 (0.56-1.41) | 0.61 |  | 0.99 (0.71-1.38) | 0.96 |
| *ABCB1* | rs4148737 | C/T | 1.21 (0.66-2.21) | 0.54 |  | 1.28 (0.94-1.75) | 0.12 |
| *ABCC1* | rs11075291 | A/G | 1.34 (0.67-2.66) | 0.41 |  | 1.16 (0.84-1.59) | 0.37 |
| *ABCC1* | rs1967120 | A/G | 1.55 (0.63-3.82) | 0.34 |  | 0.88 (0.63-1.23) | 0.47 |
| *ABCC1* | rs2074087 | C/G | 0.92 (0.31-2.66) | 0.87 |  | 1.22 (0.79-1.88) | 0.36 |
| *ABCC1* | rs212091 | C/T | 1.00 (0.37-2.71) | 0.99 |  | 1.05 (0.74-1.49) | 0.78 |
| *ABCC1* | rs2230671d | A/G | 1.06 (0.72-1.58) | 0.77 |  | - | - |
| *ABCC1* | rs246221 | C/T | 0.97 (0.66-1.41) | 0.86 |  | 0.81 (0.55-1.19) | 0.29 |
| *ABCC1* | rs246240 | G/A | 0.90 (0.61-1.32) | 0.58 |  | 0.74 (0.48-1.14) | 0.17 |
| *ABCC1* | rs35587 | C/T | 0.97 (0.66-1.41) | 0.86 |  | 0.81 (0.55-1.19) | 0.29 |
| *ABCC1* | rs35592 | T/C | 1.23 (0.83-1.83) | 0.31 |  | 1.02 (0.70-1.48) | 0.93 |
| *ABCC1* | rs35605 | T/C | 1.42 (0.55-3.68) | 0.47 |  | 1.15 (0.79-1.67) | 0.47 |
| *ABCC1* | rs3743527 | T/C | 1.11 (0.76-1.63) | 0.59 |  | 1.11 (0.79-1.55) | 0.56 |
| *ABCC1* | rs3784864 | A/G | 1.24 (0.59-2.61) | 0.58 |  | 1.02 (0.73-1.43) | 0.91 |
| *ABCC2* | rs2273697d | A/G | 1.35 (0.82-2.23) | 0.23 |  | - | - |
| *ABCC2* | rs3740066 | T/C | 1.31 (0.49-3.54) | 0.59 |  | **0.67 (0.47-0.94)** | **0.02** |
| *ABCC2* | rs4148396 | T/C | 1.11 (0.53-2.30) | 0.78 |  | 0.74 (0.53-1.02) | 0.07 |
| *ABCC2* | rs717620 | T/C | 1.71 (0.58-5.06) | 0.33 |  | **0.66 (0.48-0.92)** | **0.02** |
| *ABCC3* | rs2277624 | T/C | 1.75 (0.70-4.33) | 0.23 |  | 1.05 (0.76-1.45) | 0.77 |
| *ABCC3* | rs4148416 | T/C | - | - |  | 1.42 (0.85-2.39) | 0.18 |
| *ABCC4* | rs1059751 | G/A | 0.85 (0.54-1.34) | 0.48 |  | 0.94 (0.67-1.32) | 0.72 |
| *ABCC4* | rs11568658 | A/C | - | - |  | 1.33 (0.82-2.16) | 0.24 |
| *ABCC4* | rs1189466 | A/G | 1.43 (0.58-3.58) | 0.44 |  | 1.01 (0.72-1.41) | 0.97 |
| *ABCC4* | rs1678339 | T/C | 1.43 (0.58-3.58) | 0.44 |  | 1.01 (0.72-1.41) | 0.97 |
| *ABCC4* | rs1751034 | C/T | 1.20 (0.56-2.55) | 0.64 |  | 0.98 (0.70-1.38) | 0.91 |
| *ABCC4* | rs2274405 | C/T | 1.13 (0.75-1.71) | 0.56 |  | 1.19 (0.86-1.64) | 0.30 |
| *ABCC4* | rs2274406 | C/T | 1.13 (0.75-1.71) | 0.56 |  | 1.19 (0.86-1.64) | 0.30 |
| *ABCC4* | rs2274407 | A/C | - | - |  | 0.92 (0.66-1.29) | 0.64 |
| *ABCC4* | rs3742106 | A/C | 0.90 (0.56-1.44) | 0.66 |  | 0.99 (0.70-1.38) | 0.94 |
| *ABCC4* | rs3770 | G/A | 0.85 (0.54-1.34) | 0.49 |  | 0.99 (0.70-1.38) | 0.94 |
| *ABCC4* | rs4148551 | T/C | 0.90 (0.56-1.44) | 0.66 |  | 0.99 (0.70-1.38) | 0.94 |
| *ABCC4* | rs4148553 | T/C | 0.85 (0.54-1.34) | 0.48 |  | 0.94 (0.67-1.32) | 0.72 |
| *ABCC4* | rs6650282 | C/T | 1.72 (0.70-4.24) | 0.24 |  | 1.07 (0.77-1.47) | 0.69 |
| *ABCC4* | rs899494 | A/G | 0.99 (0.55-1.78) | 0.98 |  | 0.94 (0.67-1.30) | 0.70 |
| *ABCG2* | rs1448784 | G/A | 1.07 (0.47-2.43) | 0.88 |  | 0.83 (0.60-1.14) | 0.25 |
| *ABCG2* | rs2231142 | T/G | 0.80 (0.54-1.19) | 0.27 |  | 0.98 (0.71-1.34) | 0.89 |
| *ABCG2* | rs4367138 | G/A | 2.19 (0.65-7.37) | 0.21 |  | 0.94 (0.69-1.30) | 0.72 |
| *ABCG2* | rs72554040 | A/G | 1.03 (0.59-1.82) | 0.91 |  | 0.80 (0.56-1.15) | 0.23 |

Bold values indicate statistical significance at α = 0.05.

*Adjusted for disease activity score in 28 joints - erythrocyte sedimentation rate (DAS28-ESR)

aMinor allele/Major allele

bDominant model: Major allele carriers versus minor allele homozygotes

cRecessive model: Major allele homozygotes versus minor allele carriers

dMajor allele homozygotes versus heterozygotes due to no minor allele homozygotes

**Table S7** Bivariate association between baseline characteristics and clinical response to methotrexate assessed according to change in disease activity score in 28 joints - erythrocyte sedimentation rate (DAS28-ESR) in rheumatoid arthritis patients

| Characteristics | Change in DAS28-ESR | *P* |
| --- | --- | --- |
| Age | r = 0.02 | 0.85 |
| Sex |  |  |
| Female | 1.66 ± 1.34 | 0.47 |
| Male | 1.92 ± 1.49 |
| Disease duration | rs = -0.15 | 0.14 |
| Smokinga |  |  |
| Yes | 1.44 ± 1.43 | 0.47 |
| No | 1.76 ± 1.38 |
| Drinkinga |  |  |
| Yes | 1.04 ± 1.37 | 0.06 |
| No | 1.83 ± 1.36 |
| RF-positiveb |  |  |
| Yes | 1.67 ± 1.36 | 0.40 |
| No | 2.01 ± 1.37 |
| CCP-positivec |  |  |
| Yes | 1.69 ± 1.36 | 0.92 |
| No | 1.75 ± 1.57 |
| **TJC (per 28 joints)** | **rs = 0.66** | **< 0.01** |
| **SJC (per 28 joints)** | **rs = 0.44** | **< 0.01** |
| **ESR, mm/h** | **rs = 0.36** | **< 0.01** |
| **DAS28-ESR** | **r = 0.66** | **< 0.01** |
| Methotrexate dose | rs = 0.06 | 0.57 |
| Concomitant GC use |  |  |
| Yes | 1.78 ± 1.39 | 0.26 |
| No | 1.36 ± 1.22 |
| GC dosed | rs = 0.13 | 0.21 |
| Concomitant NSAIDs use |  |  |
| Yes | 1.26 ± 1.97 | 0.07 |
| No | 1.85 ± 1.10 |

Values are mean ± standard deviation unless otherwise stated, and bold values indicate statistical significance at α = 0.05.

CCP cyclic citrullinated peptide, DAS28 disease activity score in 28 joints, ESR erythrocyte sedimentation rate, GC glucocorticoids, IQR interquartile range, NSAIDs non-steroidal anti-inflammatory drugs, r Pearson correlation coefficient, rs Spearman rank correlation coefficient, RF rheumatoid factor, SJC swollen joint count, TJC tender joint count

a6 patients’s data was missing

b3 patients’ data was missing

c2 patients’ data was missing

dPrednisolone equivalent

**Table S8** Multivariable analysis results for associations of genetic polymorphisms within transporter genes with clinical response to methotrexate assessed according to change in disease activity score in 28 joints - erythrocyte sedimentation rate (DAS28-ESR) in rheumatoid arthritis patients*

| Gene | SNP | Allelea | Dominant modelb | |  | Recessive modelc | |
| --- | --- | --- | --- | --- | --- | --- | --- |
| β (95%CI) | *P* |  | β (95%CI) | *P* |
| *SLC19A1* | rs1051266 | T/C | 0.19 (-0.41-0.79) | 0.53 |  | 0.23 (-0.22-0.68) | 0.31 |
| *SLC19A1* | rs1131596 | G/A | 0.19 (-0.41-0.79) | 0.53 |  | 0.23 (-0.22-0.68) | 0.31 |
| *SLC19A1* | rs12659 | A/G | 0.12 (-0.46-0.70) | 0.68 |  | 0.01 (-0.45-0.46) | 0.98 |
| *SLC19A1* | rs2838956 | G/A | 0.13 (-0.45-0.71) | 0.65 |  | 0.23 (-0.21-0.68) | 0.30 |
| *SLC19A1* | rs3788200 | A/G | 0.12 (-0.47-0.71) | 0.68 |  | 0.27 (-0.19-0.73) | 0.25 |
| *SLC19A1* | rs7867 | A/G | 0.06 (-0.49-0.61) | 0.83 |  | -0.22 (-0.68-0.24) | 0.35 |
| *SLC19A1* | rs79091853 | T/C | 0.20 (-1.88-2.28) | 0.85 |  | -0.07 (-0.56-0.43) | 0.79 |
| *ABCB1* | rs1045642 | A/G | 0.04 (-0.65-0.73) | 0.91 |  | -0.12 (-0.54-0.31) | 0.59 |
| *ABCB1* | rs1128503 | G/A | **0.89 (0.28-1.50)** | **0.005** |  | 0.07 (-0.38-0.51) | 0.77 |
| *ABCB1* | rs3842 | C/T | 0.06 (-0.67-0.78) | 0.88 |  | 0.17 (-0.25-0.59) | 0.44 |
| *ABCB1* | rs4148737 | C/T | **0.90 (0.32-1.49)** | **0.003** |  | 0.06 (-0.37-0.49) | 0.78 |
| *ABCC1* | rs11075291 | A/G | 0.27 (-0.37-0.91) | 0.40 |  | 0.35 (-0.09-0.79) | 0.12 |
| *ABCC1* | rs1967120 | A/G | 0.50 (-0.25-1.26) | 0.19 |  | 0.06 (-0.36-0.48) | 0.77 |
| *ABCC1* | rs2074087 | C/G | -0.25 (-1.46-0.97) | 0.69 |  | 0.29 (-0.20-0.78) | 0.24 |
| *ABCC1* | rs212091 | C/T | -0.47 (-1.52-0.58) | 0.38 |  | -0.05 (-0.48-0.37) | 0.80 |
| *ABCC1* | rs2230671d | A/G | 0.10 (-0.41-0.61) | 0.71 |  | - | - |
| *ABCC1* | rs246221 | C/T | -0.18 (-0.67-0.32) | 0.48 |  | -0.18 (-0.65-0.28) | 0.44 |
| *ABCC1* | rs246240 | G/A | -0.54 (-1.11-0.04) | 0.07 |  | -0.24 (-0.69-0.21) | 0.29 |
| *ABCC1* | rs35587 | C/T | -0.18 (-0.67-0.32) | 0.48 |  | -0.18 (-0.65-0.28) | 0.44 |
| *ABCC1* | rs35592 | T/C | 0.17 (-0.31-0.65) | 0.49 |  | 0.23 (-0.26-0.72) | 0.35 |
| *ABCC1* | rs35605 | T/C | -0.13 (-1.19-0.92) | 0.80 |  | 0.23 (-0.22-0.69) | 0.31 |
| *ABCC1* | rs3743527 | T/C | 0.10 (-0.40-0.59) | 0.70 |  | 0.40 (-0.08-0.88) | 0.10 |
| *ABCC1* | rs3784864 | A/G | 0.47 (-0.24-1.19) | 0.19 |  | 0.07 (0-0.36-0.50) | 0.75 |
| *ABCC2* | rs2273697d | A/G | 0.14 (-0.38-0.67) | 0.59 |  | - | - |
| *ABCC2* | rs3740066 | T/C | 0.11 (-0.95-1.16) | 0.84 |  | -0.18 (-0.60-0.24) | 0.40 |
| *ABCC2* | rs4148396 | T/C | 0.36 (-0.59-1.31) | 0.46 |  | -0.31 (-0.73-0.11) | 0.15 |
| *ABCC2* | rs717620 | T/C | 0.85 (-0.08-1.79) | 0.07 |  | -0.33 (-0.75-0.09) | 0.12 |
| *ABCC3* | rs2277624 | T/C | **0.75 (0.04-1.46)** | **0.04** |  | 0.00 (-0.42-0.42) | 0.99 |
| *ABCC3* | rs4148416 | T/C | -0.39 (-1.87-1.09) | 0.60 |  | **0.52 (0.03-1.01)** | **0.04** |
| *ABCC4* | rs1059751 | G/A | 0.19 (-0.30-0.69) | 0.43 |  | 0.06 (-0.40-0.51) | 0.80 |
| *ABCC4* | rs11568658 | A/C | -0.96 (-3.04-1.11) | 0.36 |  | 0.16 (-0.34-0.66) | 0.54 |
| *ABCC4* | rs1189466 | A/G | 0.35 (-0.41-1.11) | 0.37 |  | -0.03 (-0.45-0.39) | 0.89 |
| *ABCC4* | rs1678339 | T/C | 0.35 (-0.41-1.11) | 0.37 |  | -0.03 (-0.45-0.39) | 0.89 |
| *ABCC4* | rs1751034 | C/T | 0.27 (-0.45-0.99) | 0.46 |  | -0.06 (-0.48-0.36) | 0.77 |
| *ABCC4* | rs2274405 | C/T | -0.09 (-0.57-0.39) | 0.71 |  | 0.12 (-0.36-0.60) | 0.61 |
| *ABCC4* | rs2274406 | C/T | -0.09 (-0.57-0.39) | 0.71 |  | 0.12 (-0.36-0.60) | 0.61 |
| *ABCC4* | rs2274407 | A/C | -0.96 (-2.43-0.50) | 0.20 |  | -0.25 (-0.73-0.22) | 0.29 |
| *ABCC4* | rs3742106 | A/C | 0.26 (-0.23-0.74) | 0.30 |  | 0.07 (-0.39-0.53) | 0.75 |
| *ABCC4* | rs3770 | G/A | 0.21 (-0.27-0.69) | 0.39 |  | 0.07 (-0.39-0.53) | 0.75 |
| *ABCC4* | rs4148551 | T/C | 0.26 (-0.23-0.74) | 0.30 |  | 0.07 (-0.39-0.53) | 0.75 |
| *ABCC4* | rs4148553 | T/C | 0.19 (-0.30-0.69) | 0.43 |  | 0.06 (-0.40-0.51) | 0.80 |
| *ABCC4* | rs6650282 | C/T | 0.69 (-0.07-1.44) | 0.07 |  | -0.05 (-0.47-0.37) | 0.82 |
| *ABCC4* | rs899494 | A/G | 0.34 (-0.38-1.07) | 0.35 |  | **0.43 (0.01-0.84)** | **0.05** |
| *ABCG2* | rs1448784 | G/A | 0.45 (-0.42-1.32) | 0.31 |  | -0.03 (-0.45-0.39) | 0.88 |
| *ABCG2* | rs2231142 | T/G | -0.63 (-1.39-0.13) | 0.10 |  | -0.05 (-0.47-0.37) | 0.82 |
| *ABCG2* | rs4367138 | G/A | 0.61 (-0.14-1.37) | 0.11 |  | -0.01 (-0.43-0.41) | 0.96 |
| *ABCG2* | rs72554040 | A/G | 0.08 (-0.52-0.68) | 0.79 |  | -0.07 (-0.51-0.37) | 0.77 |

Bold values indicate statistical significance at α = 0.05.

*Adjusted for disease activity score in 28 joints - erythrocyte sedimentation rate (DAS28-ESR)

aMinor allele/Major allele

bDominant model: Major allele carriers versus minor allele homozygotes

cRecessive model: Major allele homozygotes versus minor allele carriers

dMajor allele homozygotes versus heterozygotes due to no minor allele homozygotes

**Table S9** Bivariate association between baseline characteristics and clinical response to methotrexate assessed according to change in disease activity score in 28 joints - erythrocyte sedimentation rate (DAS28-ESR) > 0.6 in rheumatoid arthritis patients

| Characteristics | RA patients  (n = 100) | Responders  (n = 78) | Non-responders  (n = 22) | *P* |
| --- | --- | --- | --- | --- |
| Age, years | 52.23 ± 12.71 | 52.15 ± 12.81 | 52.50 ± 12.67 | 0.91 |
| Female, n (%) | 81 (81.00) | 65 (83.33) | 16 (72.73) | 0.36e |
| **Disease duration, years, median (IQR)** | **0.50 (0.25-2.00)** | **0.46 (0.17-1.33)** | **0.92 (0.42-4.00)** | **0.04** |
| Smokinga, n (%) | 12 (12.77) | 7 (9.59) | 5 (23.81) | 0.13e |
| **Drinkinga, n (%)** | **12 (12.77)** | **6 (8.22)** | **6 (28.57)** | **0.02e** |
| RF-positiveb, n (%) | 82 (84.54) | 64 (84.21) | 18 (85.71) | 1.00e |
| CCP-positivec, n (%) | 91 (92.86) | 72 (93.51) | 19 (90.48) | 0.64e |
| **TJC (per 28 joints), median (IQR)** | **5.0 (2.5-10.0)** | **7.0 (3.0-10.0)** | **3.0 (2.0-5.0)** | **< 0.01** |
| SJC (per 28 joints), median (IQR) | 4.0 (2.0-8.5) | 4.5 (2.0-9.0) | 3.0 (2.0-6.0) | 0.36 |
| **ESR, mm/h, median (IQR)** | **37.0 (20.0-59.5)** | **39.5 (28.0-63.0)** | **23.0 (12.0-40.0)** | **0.01** |
| **DAS28-ESR** | **4.87 ± 1.15** | **5.09 ± 1.12** | **4.12 ± 0.94** | **< 0.01** |
| Methotrexate dose, mg/week, median (IQR) | 10 (10-10) | 10 (10-10) | 10 (10-10) | 0.60 |
| Concomitant GC use, n (%) | 82 (82.00) | 66 (84.62) | 16 (72.73) | 0.22e |
| GC dosed, mg/d, median (IQR) | 5.0 (2.5-10.0) | 5.0 (2.5-10.0) | 5.0 (0-10.0) | 0.79 |
| **Concomitant NSAIDs use, n (%)** | **23 (23.00)** | **14 (17.95)** | **9 (40.91)** | **0.02** |

Values are mean ± standard deviation unless otherwise stated, and bold values indicate statistical significance at α = 0.05.

CCP cyclic citrullinated peptide, DAS28 disease activity score in 28 joints, ESR erythrocyte sedimentation rate, GC glucocorticoids, IQR interquartile range, NSAIDs non-steroidal anti-inflammatory drug, RF rheumatoid factor, SJC swollen joint count, TJC tender joint count

a6 patients’s data was missing

b3 patients’ data was missing

c2 patients’ data was missing

dPrednisolone equivalent

eFisher exact test

**Table S10** Multivariable analysis results for associations of genetic polymorphisms within transporter genes with clinical response to methotrexate assessed according to change in disease activity score in 28 joints - erythrocyte sedimentation rate (DAS28-ESR) > 0.6 in rheumatoid arthritis patients*

| Gene | SNP | Allelea | Dominant modelb | |  | Recessive modelc | |
| --- | --- | --- | --- | --- | --- | --- | --- |
| RR (95%CI) | *P* |  | RR (95%CI) | *P* |
| *SLC19A1* | rs1051266 | T/C | **1.45 (1.04-2.02)** | **0.03** |  | **1.23 (1.02-1.48)** | **0.03** |
| *SLC19A1* | rs1131596 | G/A | **1.45 (1.04-2.02)** | **0.03** |  | **1.23 (1.02-1.48)** | **0.03** |
| *SLC19A1* | rs12659 | A/G | **1.44 (1.07-1.96)** | **0.02** |  | 1.20 (0.99-1.44) | 0.06 |
| *SLC19A1* | rs2838956 | G/A | **1.39 (1.01-1.90)** | **0.04** |  | **1.23 (1.03-1.48)** | **0.02** |
| *SLC19A1* | rs3788200 | A/G | **1.47 (1.08-1.99)** | **0.01** |  | **1.20 (1.00-1.45)** | **0.05** |
| *SLC19A1* | rs7867 | A/G | 1.27 (0.96-1.68) | 0.10 |  | 1.19 (0.97-1.46) | 0.10 |
| *SLC19A1* | rs79091853 | T/C | - | - |  | **0.81 (0.68-0.95)** | **0.01** |
| *ABCB1* | rs1045642 | A/G | 0.96 (0.73-1.27) | 0.79 |  | 0.93 (0.76-1.13) | 0.46 |
| *ABCB1* | rs1128503 | G/A | 1.38 (0.90-2.12) | 0.15 |  | 1.00 (0.83-1.20) | 1.00 |
| *ABCB1* | rs3842 | C/T | 0.90 (0.68-1.19) | 0.47 |  | **1.23 (1.01-1.49)** | **0.04** |
| *ABCB1* | rs4148737 | C/T | 1.32 (0.91-1.90) | 0.14 |  | 1.04 (0.87-1.26) | 0.65 |
| *ABCC1* | rs11075291 | A/G | 0.99 (0.79-1.24) | 0.94 |  | 1.09 (0.90-1.33) | 0.35 |
| *ABCC1* | rs1967120 | A/G | 1.03 (0.75-1.42) | 0.85 |  | 1.00 (0.83-1.21) | 0.99 |
| *ABCC1* | rs2074087 | C/G | 1.20 (0.76-1.92) | 0.44 |  | 1.18 (0.95-1.47) | 0.14 |
| *ABCC1* | rs212091 | C/T | - | - |  | 1.00 (0.83-1.20) | 0.96 |
| *ABCC1* | rs2230671d | A/G | 0.96 (0.74-1.26) | 0.79 |  | - | - |
| *ABCC1* | rs246221 | C/T | 0.95 (0.76-1.19) | 0.68 |  | 0.89 (0.72-1.09) | 0.26 |
| *ABCC1* | rs246240 | G/A | 0.86 (0.68-1.10) | 0.23 |  | 0.87 (0.71-1.06) | 0.17 |
| *ABCC1* | rs35587 | C/T | 0.95 (0.76-1.19) | 0.68 |  | 0.89 (0.72-1.09) | 0.26 |
| *ABCC1* | rs35592 | T/C | 1.07 (0.87-1.31) | 0.52 |  | 1.07 (0.87-1.31) | 0.55 |
| *ABCC1* | rs35605 | T/C | 1.07 (0.76-1.51) | 0.70 |  | 1.18 (0.96-1.45) | 0.12 |
| *ABCC1* | rs3743527 | T/C | 0.94 (0.76-1.16) | 0.56 |  | **1.22 (1.02-1.46)** | **0.03** |
| *ABCC1* | rs3784864 | A/G | 0.91 (0.74-1.10) | 0.32 |  | 0.99 (0.82-1.21) | 0.94 |
| *ABCC2* | rs2273697d | A/G | 1.19 (0.89-1.59) | 0.24 |  | - | - |
| *ABCC2* | rs3740066 | T/C | 0.77 (0.55-1.07) | 0.11 |  | **0.81 (0.67-0.99)** | **0.04** |
| *ABCC2* | rs4148396 | T/C | 0.97 (0.59-1.60) | 0.91 |  | **0.81 (0.68-0.98)** | **0.03** |
| *ABCC2* | rs717620 | T/C | 1.08 (0.53-2.17) | 0.84 |  | **0.79 (0.65-0.95)** | **0.01** |
| *ABCC3* | rs2277624 | T/C | 1.06 (0.73-1.53) | 0.76 |  | 0.97 (0.81-1.17) | 0.77 |
| *ABCC3* | rs4148416 | T/C | - | - |  | 1.17 (0.92-1.49) | 0.21 |
| *ABCC4* | rs1059751 | G/A | 0.96 (0.79-1.15) | 0.64 |  | 1.09 (0.88-1.33) | 0.43 |
| *ABCC4* | rs11568658 | A/C | - | - |  | 0.99 (0.79-1.25) | 0.95 |
| *ABCC4* | rs1189466 | A/G | 1.05 (0.75-1.48) | 0.78 |  | 1.00 (0.82-1.23) | 1.00 |
| *ABCC4* | rs1678339 | T/C | 1.05 (0.75-1.48) | 0.78 |  | 1.00 (0.82-1.23) | 1.00 |
| *ABCC4* | rs1751034 | C/T | 0.98 (0.72-1.35) | 0.91 |  | 0.99 (0.81-1.21) | 0.89 |
| *ABCC4* | rs2274405 | C/T | 1.09 (0.88-1.36) | 0.42 |  | 0.97 (0.80-1.18) | 0.76 |
| *ABCC4* | rs2274406 | C/T | 1.09 (0.88-1.36) | 0.42 |  | 0.97 (0.80-1.18) | 0.76 |
| *ABCC4* | rs2274407 | A/C | - | - |  | 1.01 (0.81-1.27) | 0.90 |
| *ABCC4* | rs3742106 | A/C | 0.96 (0.80-1.15) | 0.64 |  | 1.07 (0.87-1.32) | 0.51 |
| *ABCC4* | rs3770 | G/A | 0.96 (0.80-1.15) | 0.68 |  | 1.07 (0.87-1.32) | 0.51 |
| *ABCC4* | rs4148551 | T/C | 0.96 (0.80-1.15) | 0.64 |  | 1.07 (0.87-1.32) | 0.51 |
| *ABCC4* | rs4148553 | T/C | 0.96 (0.79-1.15) | 0.64 |  | 1.09 (0.88-1.33) | 0.43 |
| *ABCC4* | rs6650282 | C/T | 1.11 (0.69-1.76) | 0.67 |  | 0.96 (0.79-1.15) | 0.63 |
| *ABCC4* | rs899494 | A/G | 0.96 (0.82-1.12) | 0.57 |  | 1.01 (0.83-1.22) | 0.93 |
| *ABCG2* | rs1448784 | G/A | 0.83 (0.54-1.26) | 0.38 |  | 0.83 (0.68-1.02) | 0.08 |
| *ABCG2* | rs2231142 | T/G | 0.92 (0.75-1.12) | 0.39 |  | 0.99 (0.82-1.20) | 0.96 |
| *ABCG2* | rs4367138 | G/A | **0.74 (0.58-0.95)** | **0.02** |  | 0.88 (0.73-1.06) | 0.18 |
| *ABCG2* | rs72554040 | A/G | 0.91 (0.72-1.13) | 0.38 |  | 0.91 (0.74-1.12) | 0.37 |

Bold values indicate statistical significance at α = 0.05.

*Adjusted for disease duration, drinking, disease activity score in 28 joints - erythrocyte sedimentation rate (DAS28-ESR) and concomitant NSAIDs use

aMinor allele/Major allele

bDominant model: Major allele carriers versus minor allele homozygotes

cRecessive model: Major allele homozygotes versus minor allele carriers

dMajor allele homozygotes versus heterozygotes due to no minor allele homozygotes


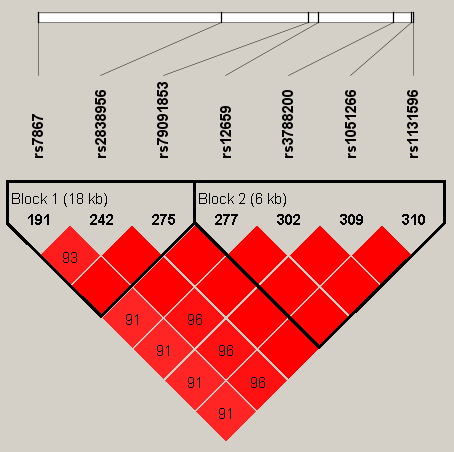


**Figure S1** Linkage disequilibrium (LD) plot for genetic polymorphisms within *SLC19A1* in Han Chinese in Beijing, China from 1000 Genomes Project Phase 3 using the Haploview software package (Broad Institute of MIT and Harvard). Haplotype block was defined using Confidence intervals LD method.


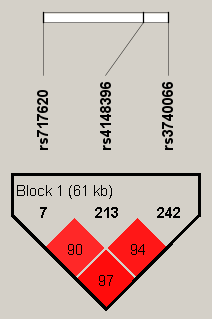


**Figure S2** Linkage disequilibrium (LD) plot for genetic polymorphisms within *ABCC2*, found to be associated with clinical response to MTX, in Han Chinese in Beijing, China from 1000 Genomes Project Phase 3 using the Haploview software package (Broad Institute of MIT and Harvard).
